# Supplementary material
Source: Springer Nature journal article supplement (https://www.springermedizin.de/resource/supplementary/13601_2013_634_MOESM5_ESM.pdf/9677880)

**A**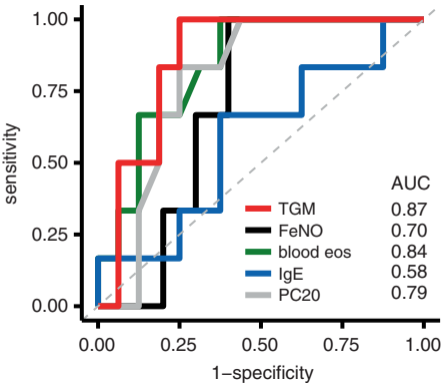**B**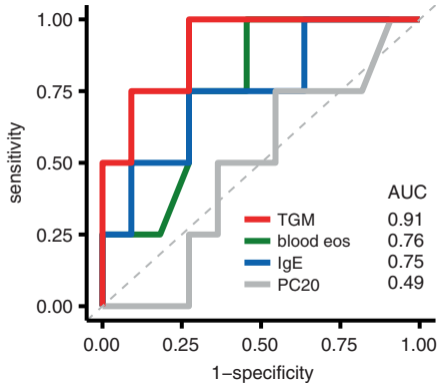

Supplement: MOESM5 [file 9677880]
